# Supplementary material for: CRISPR-Cas9 globin editing can induce megabase-scale copy-neutral losses of heterozygosity in hematopoietic cells
Source: PubMed Central journal article supplement (PMC8363739; doi:10.1038/s41467-021-25190-6), 2021-08-13
Supplement: 41467_2021_25190_MOESM1_ESM.pdf [file 41467_2021_25190_MOESM1_ESM.pdf]

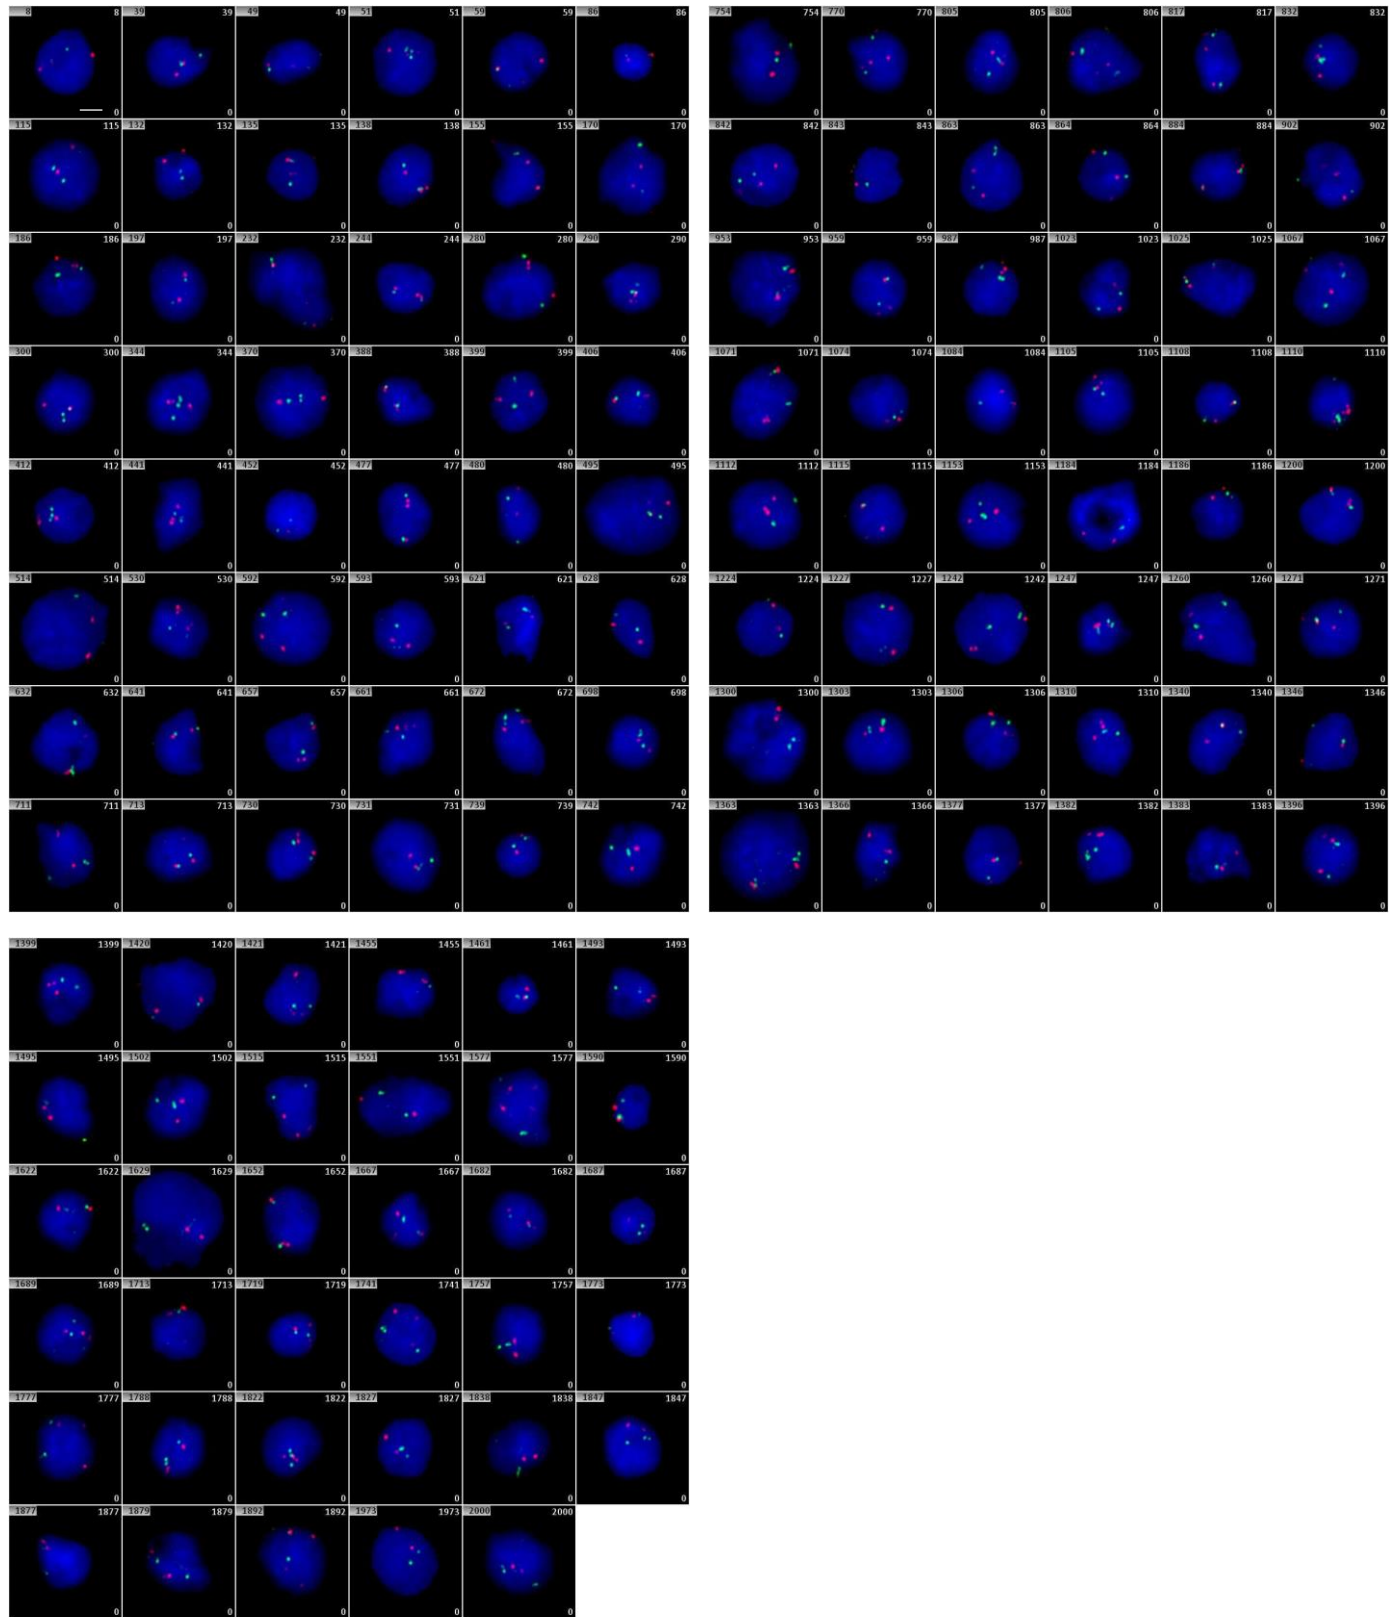

**Supplementary Figure 1** Representative HEK cells FISH image gallery day 4 after protocol #1 (n=551 cells). Scale-bar: 5 $\mu$ m

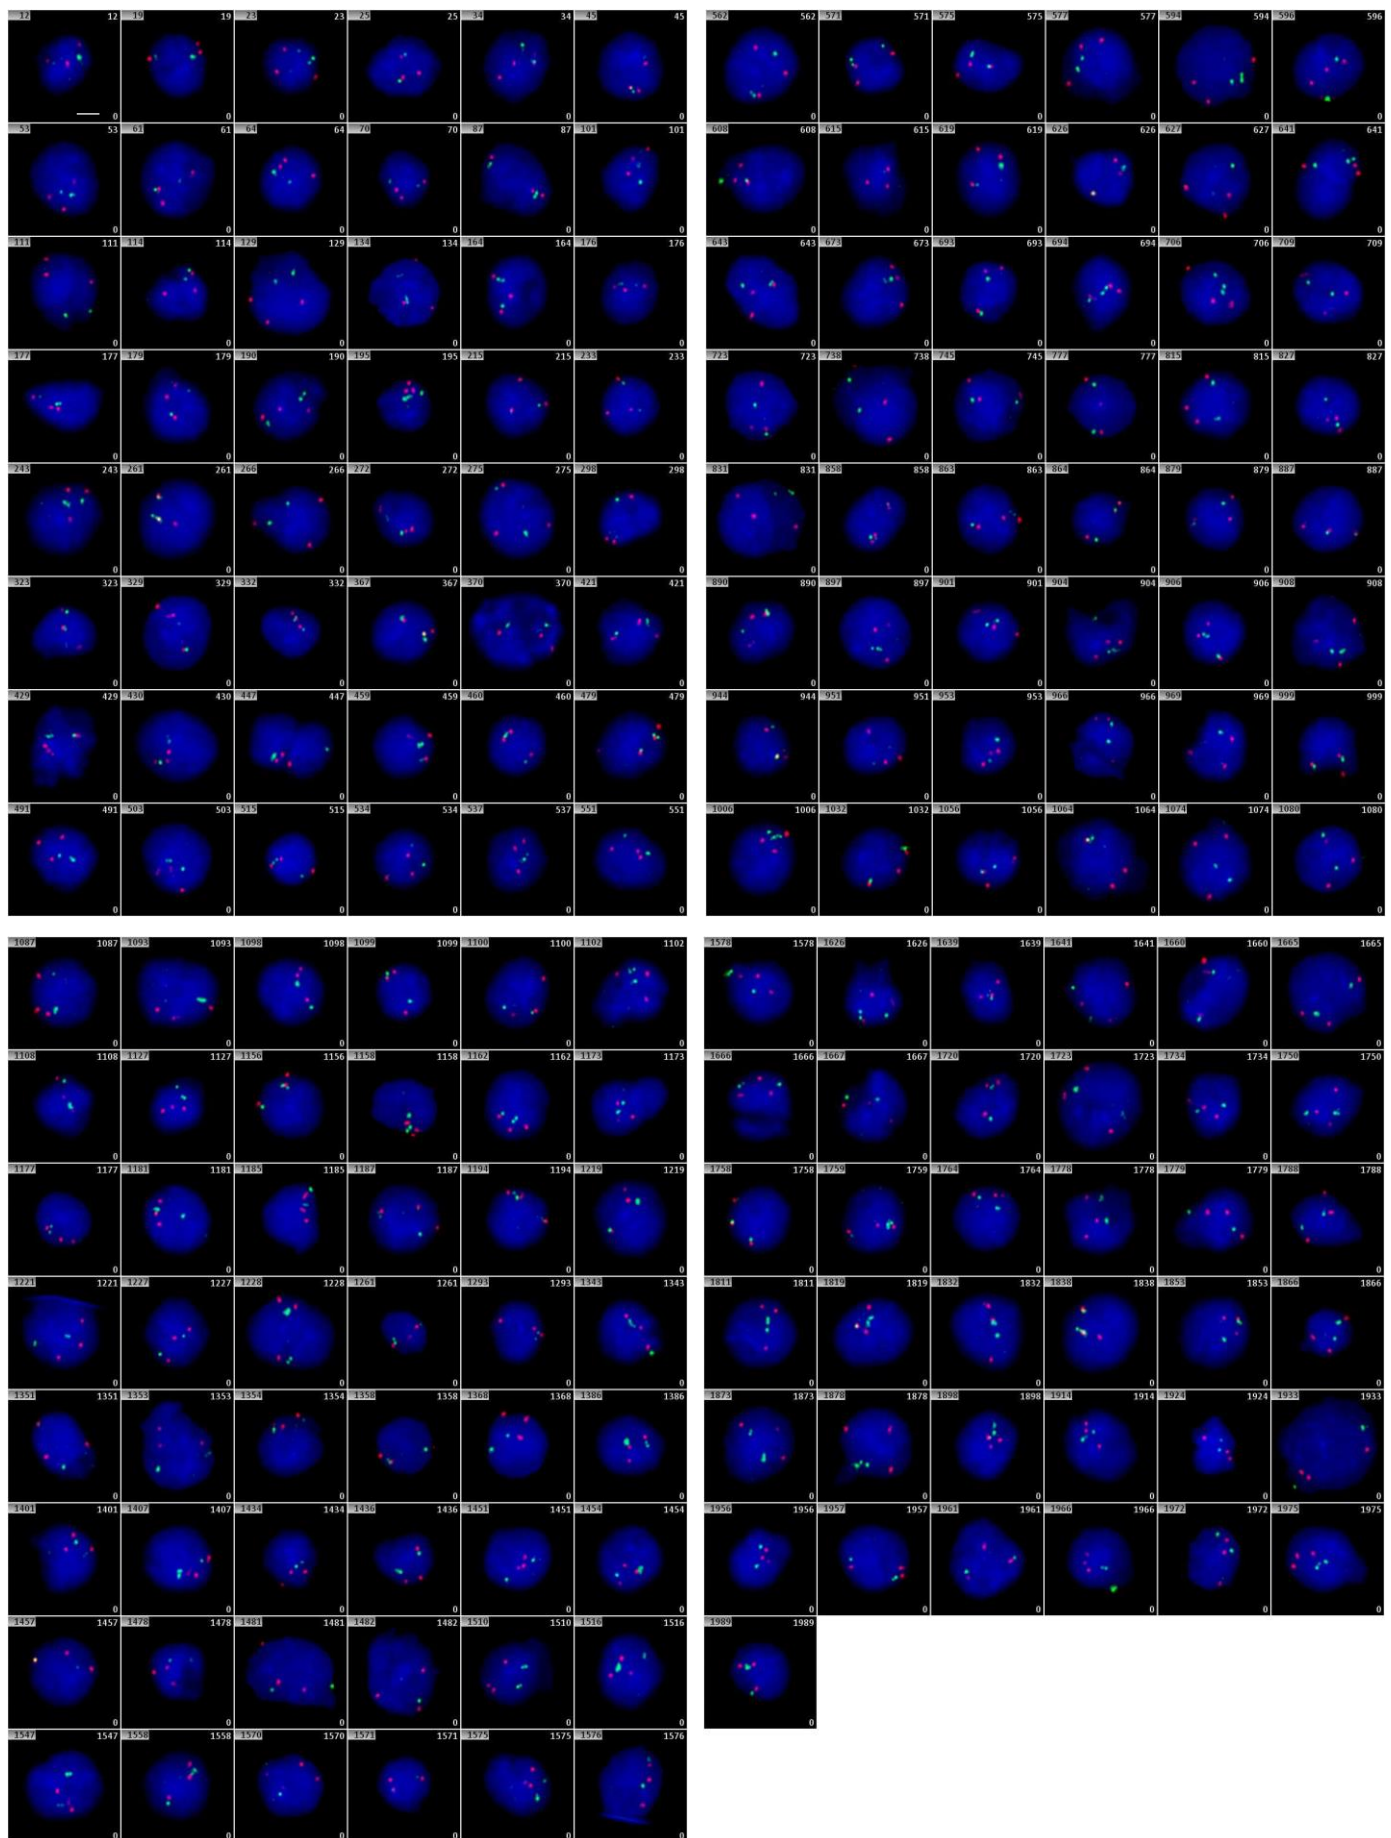

**Supplementary Figure 2** Representative HEK cells FISH image gallery day 4 after protocol #2 (n=612 cells). Scale-bar: 5µm

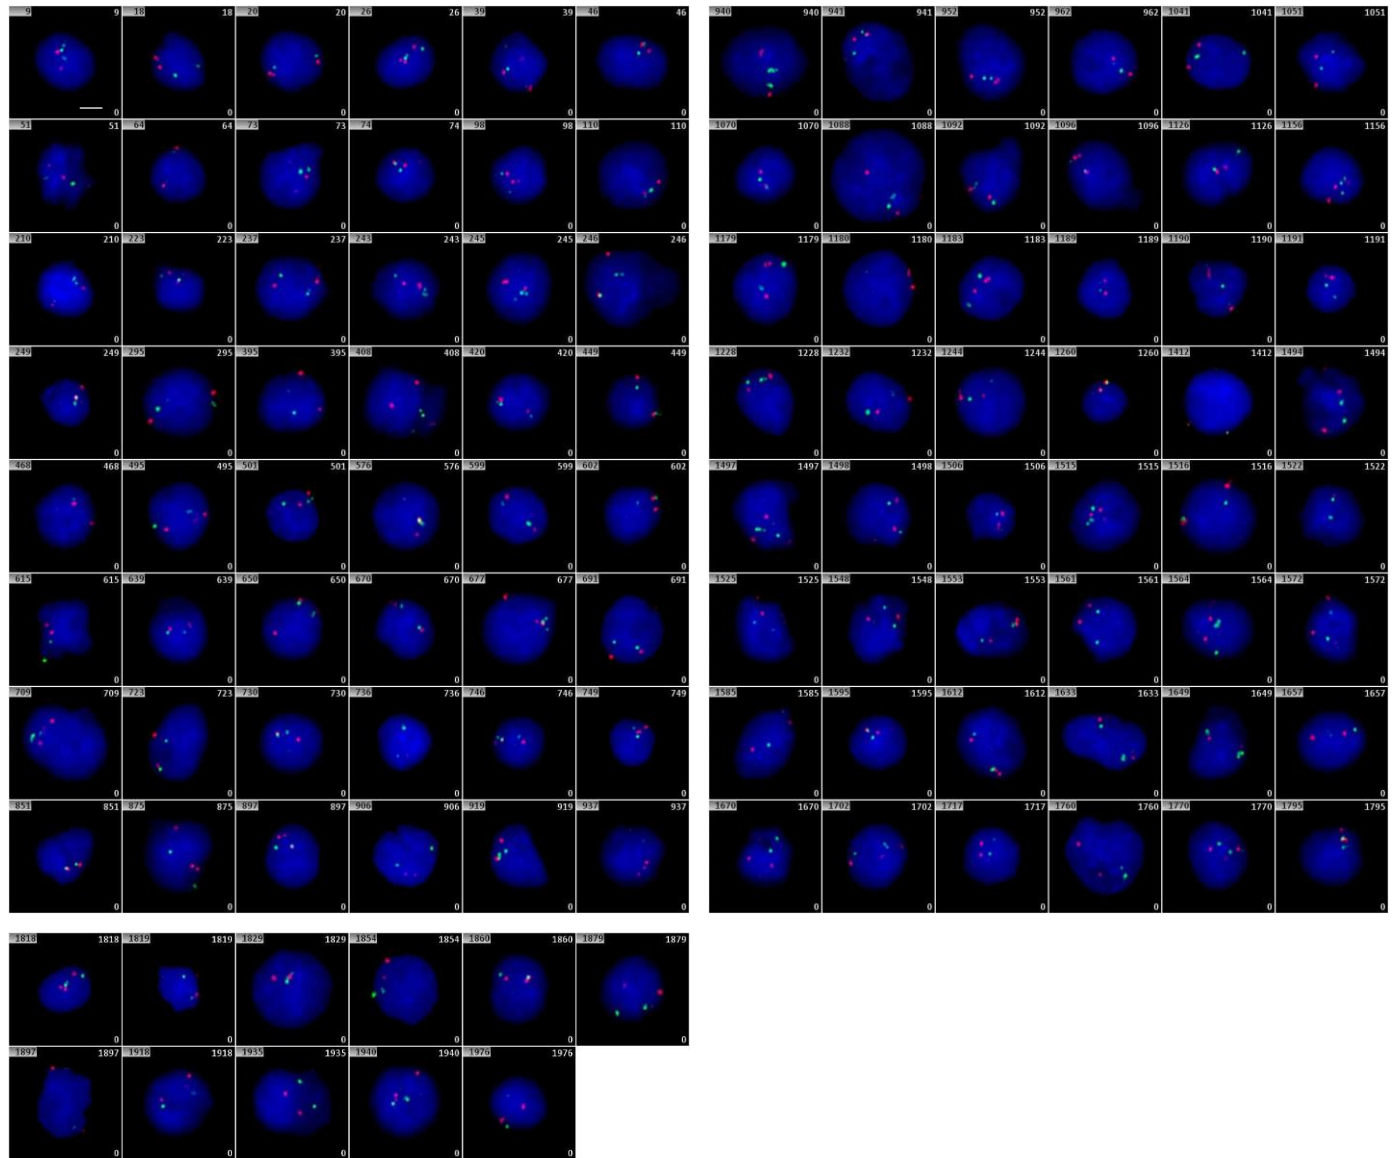

**Supplementary Figure 3** Representative HEK cells FISH image gallery day 4 after protocol # 3 (n=673 cells in the experiment). Scale-bar: 5 $\mu$ m

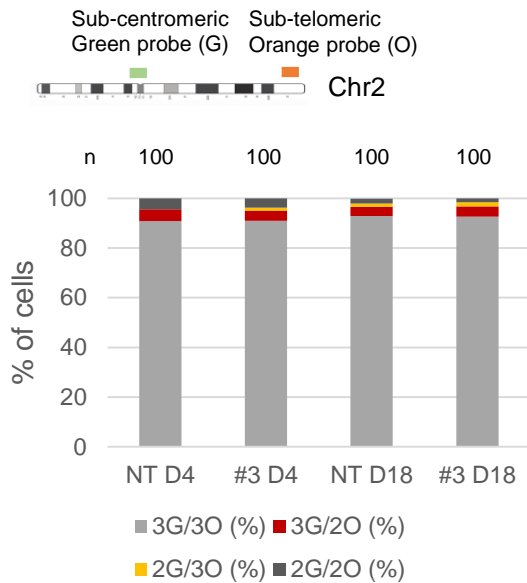

| Chr 2  | 3G/3O (%) | 3G/2O (%) | 2G/3O (%) | 2G/2O (%) |
|--------|-----------|-----------|-----------|-----------|
| NT D4  | 90.9      | 4.9       | 0         | 4.3       |
| #3 D4  | 90.9      | 4.2       | 1.2       | 3.7       |
| NT D18 | 93        | 3.7       | 1.3       | 2         |
| #3 D18 | 92.6      | 4.2       | 1.6       | 1.6       |

**Supplementary Figure 4: Chr 2-FISH profile distribution of HEK cells, targeting globin genes in chr 11 at day 4 and at day 18.**

After globin targeting by protocol #3 (Chr11) by nuclease, chromosome 2 integrity is analyzed at day 5 by DNA-FISH using a sub-centromeric Chr2 green probe (G) and a subtelomeric Chr2 orange probe (O). 3G/2O percentages are stable between conditions.

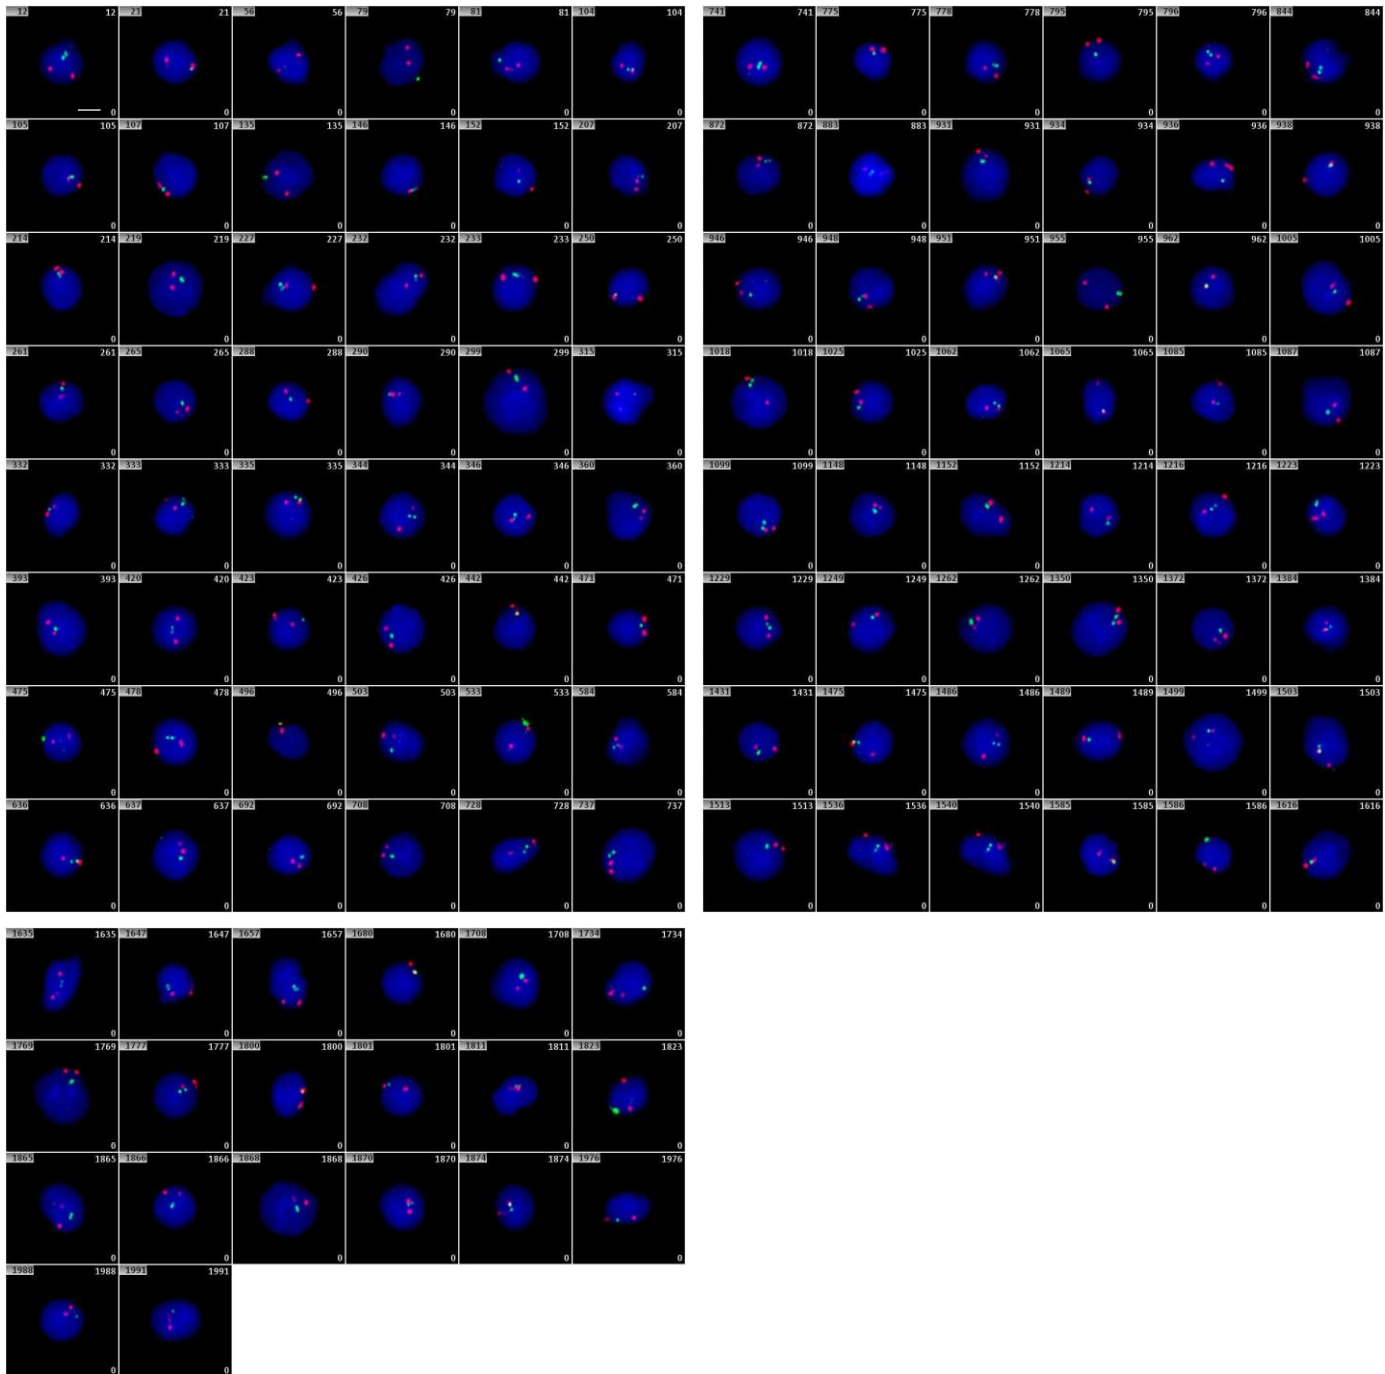

**Supplementary Figure 5** Representative CD34<sup>+</sup> cells FISH image gallery after protocol #1. 2 independent experiments analyzed at day 5 (n= 1100 cells). Scale-bar: 5µm

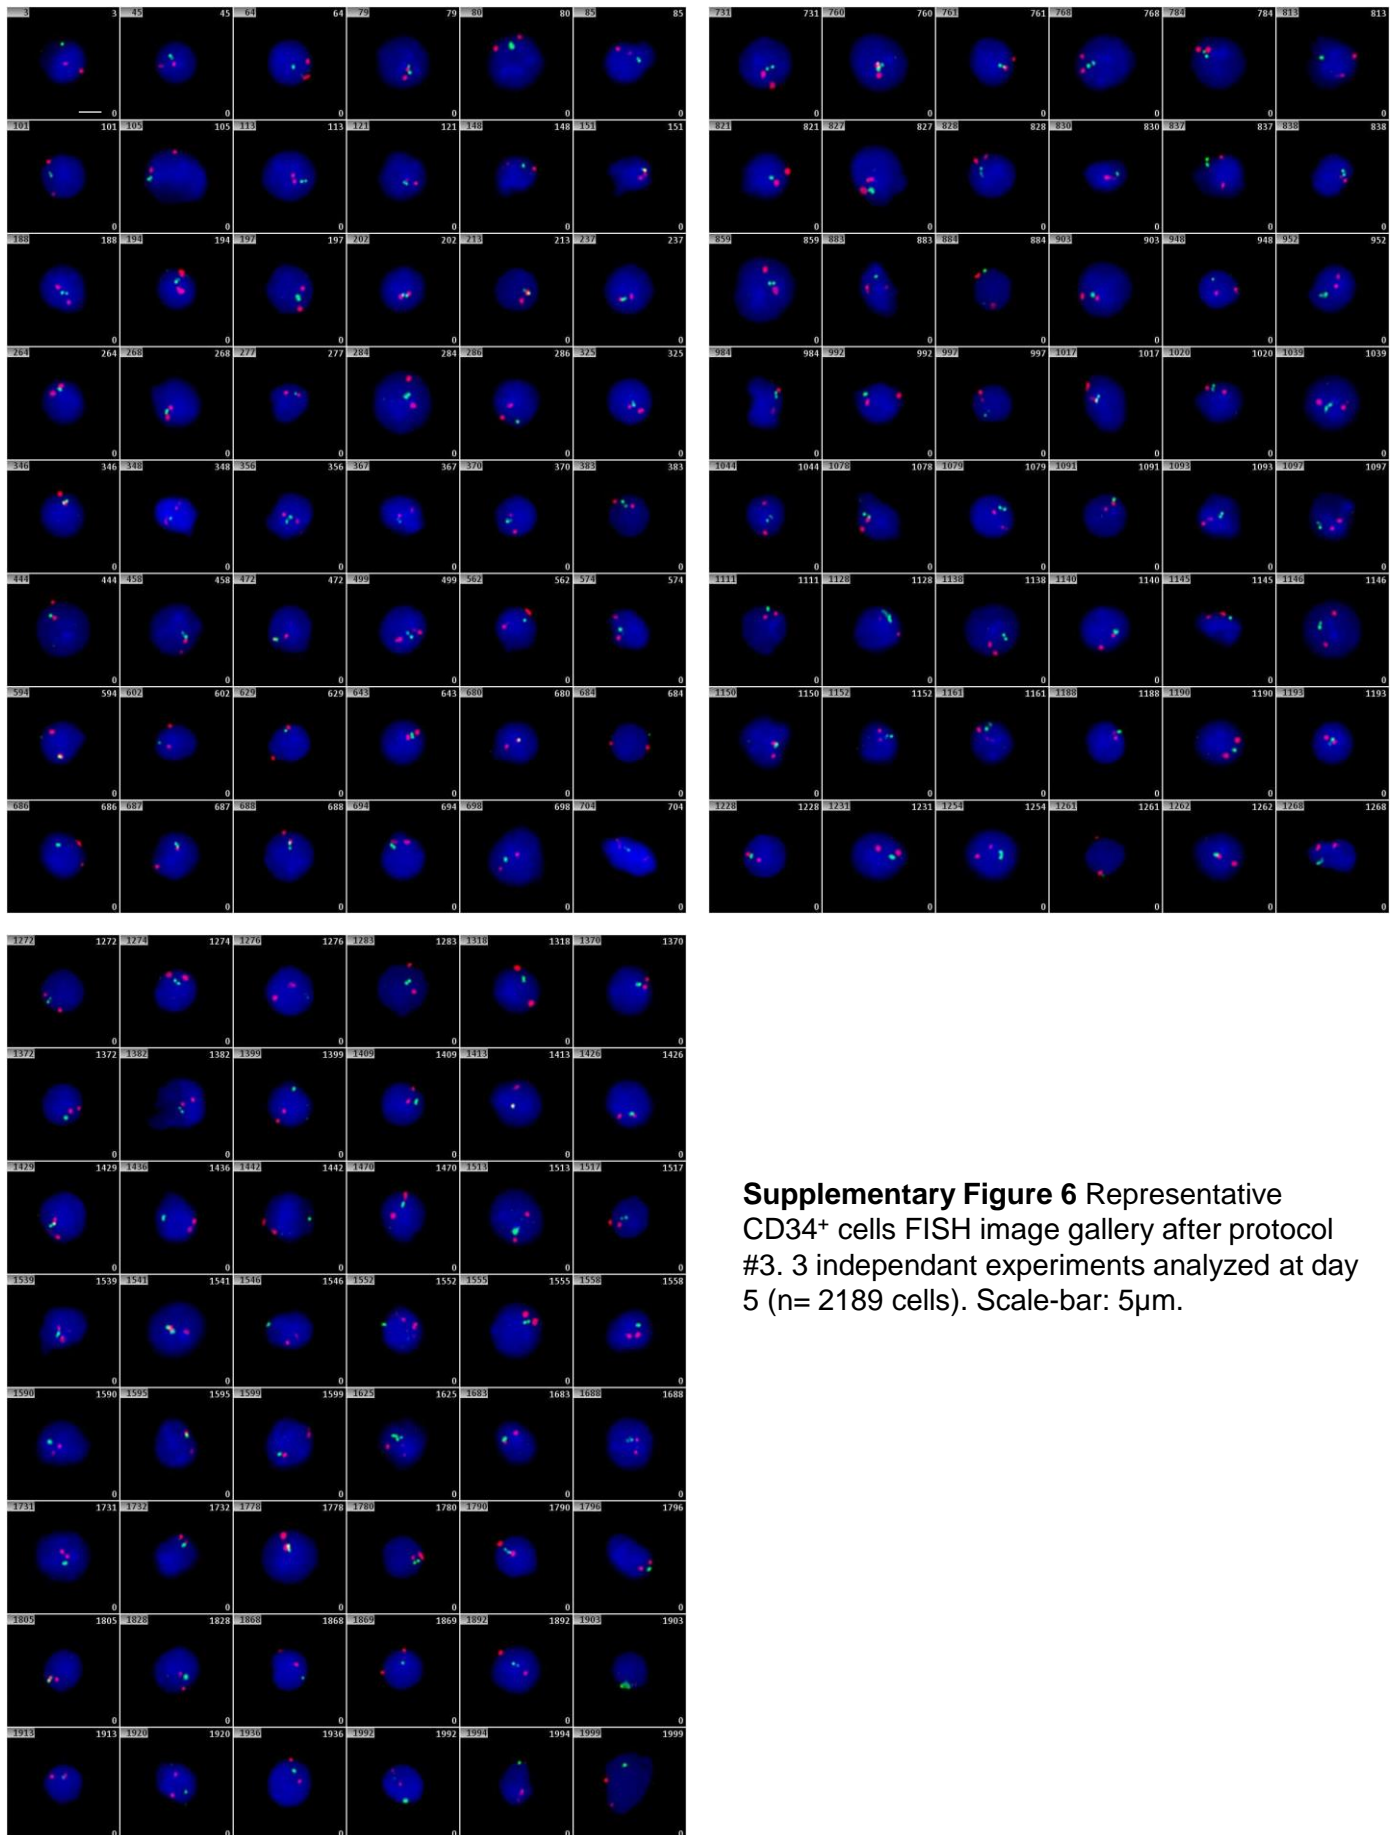

**Supplementary Figure 6** Representative CD34<sup>+</sup> cells FISH image gallery after protocol #3. 3 independent experiments analyzed at day 5 (n= 2189 cells). Scale-bar: 5µm.

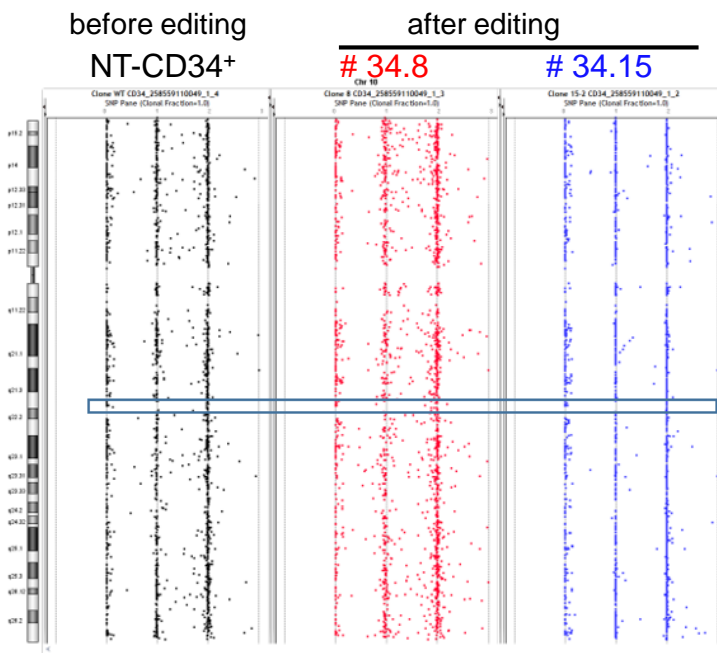

Chr10 with constitutive LOH in edited clones and in cells before editing

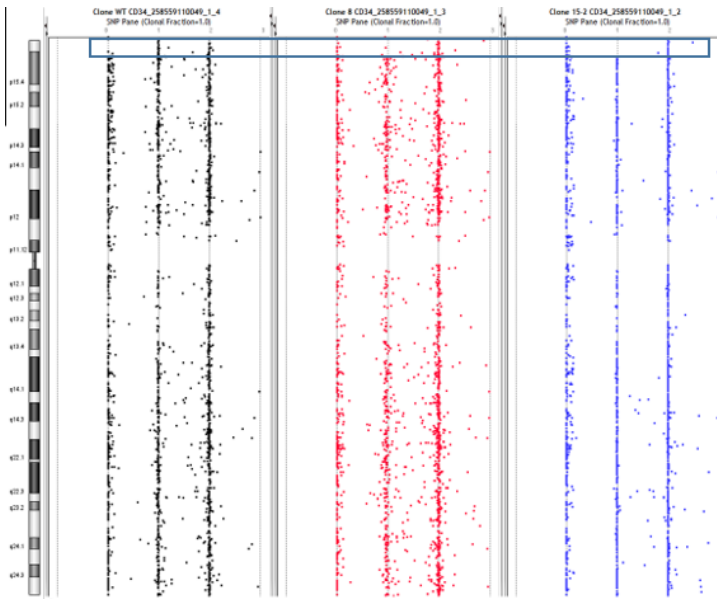

Chr11 with induced LOH in edited clones

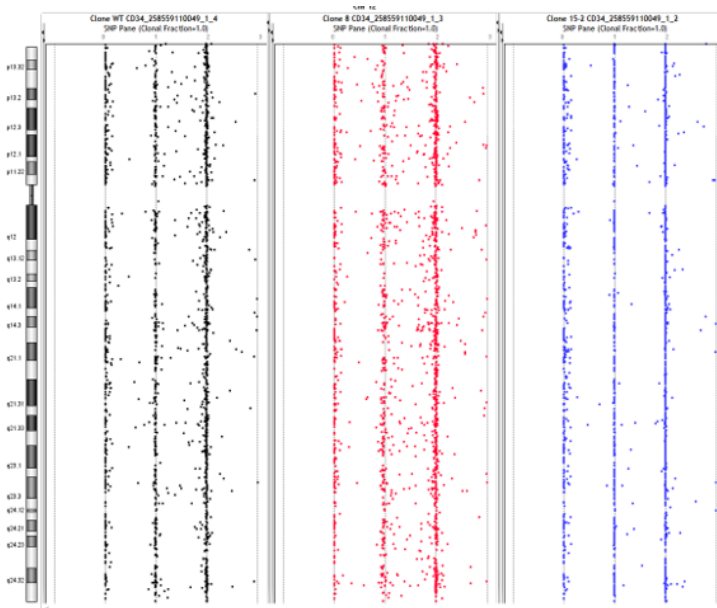

Chr12 without LOH in cells before editing and edited clones

**Supplementary Fig 7:** SNP-array pictures of CD34<sup>+</sup> clones. Chr 10 with the single constitutive LOH, Chr11 with the single induced LOH and Chr 12, representative of all other normal chromosomes, are presented.

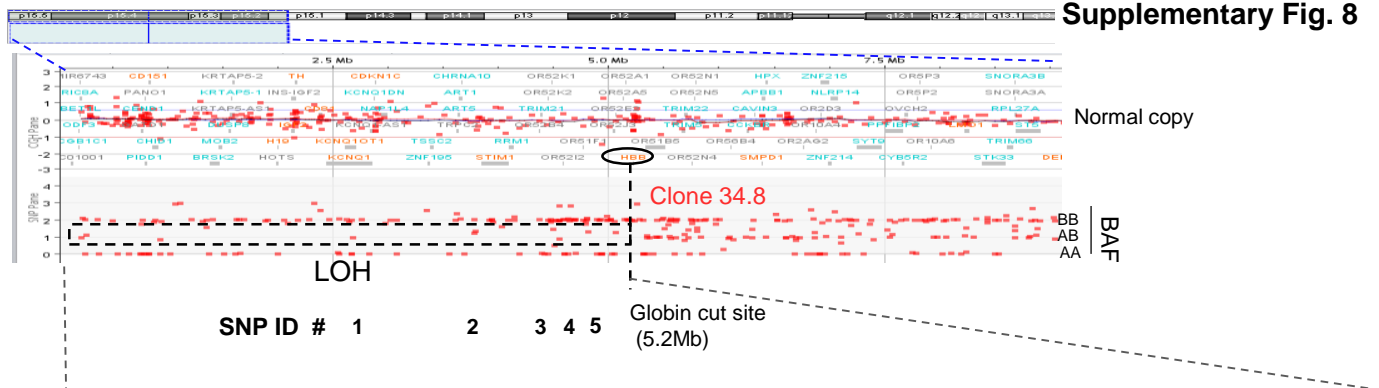

| SNP ID                | #1 - rs231357         | #2 - rs7120938       | #3 - rs331512         | #4 - rs1430399       | #5 - rs10836711         |
|-----------------------|-----------------------|----------------------|-----------------------|----------------------|-------------------------|
| Position              | 2.6 Mb                | 3.9 Mb               | 4.4 Mb                | 4.5 Mb               | 4.8 Mb                  |
| Fwd primer            | CCCCACACTCACTGCTACAT  | AGACATTTCTCTCTCTCGG  | TTTCCCCTCTGCTGCAAAAC  | GCTGCCATCTACTATCCCCA | ACAGGCTTAGACTAAAGGGTGT  |
| Rev primer            | GGGGAGGATGAAGTTAGCTGA | CCAGCTGTGCCTTGTTTCAA | ACAGGCAGTGAGTCAGATTCA | GGAAATGCCAGCCTGCAT   | TGAAAGGCACAAATGAATGAGTT |
| Clone 34.8 (LOH pos)  | A                     | T                    | G                     | G                    | G                       |
| Clone 34.15 (LOH pos) | A                     | T                    | G                     | G                    | G                       |
| Clone 1 WT (LOH neg)  | A/G                   | C/T                  | A/G                   | A/G                  | A/G                     |

**Supplemental Figure 8 : Chromosome 11p15 SNP sequencing of clones from protocols #3.1 and #3.2**  
 SNP array analysis of clone CD34.8 showed imperfect LOH starting from *HBB* at Chr11p15.4 at 5.2 Mb towards Chr11p15.15 region. SNP sequencing was performed along the chromosome 11p15 region in clones 34.8, 34.15 and clone 1 are LOH positive and LOH negative controls respectively. Position of SNP from telomere (11p arm extremity). Source data are provided as a Source Data file



a.

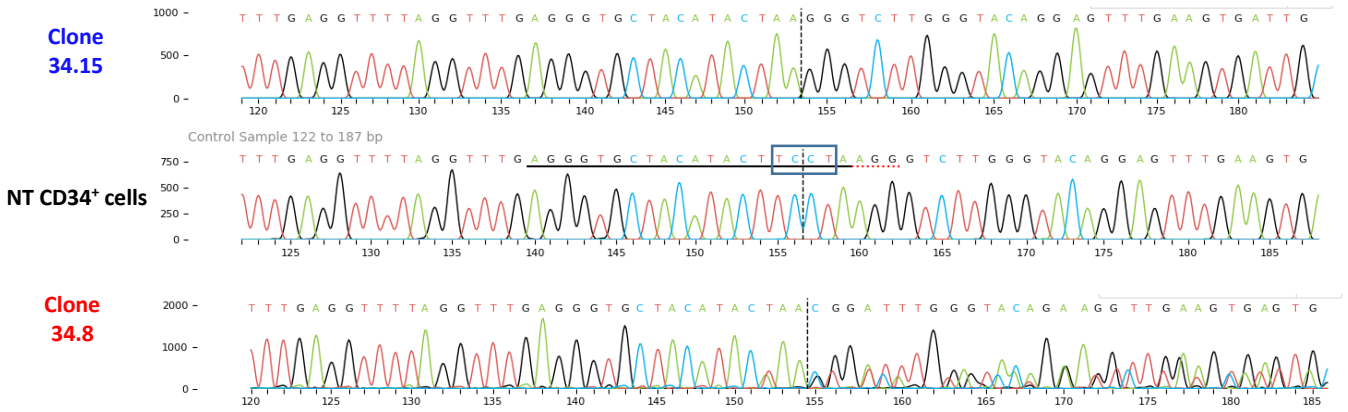

b.

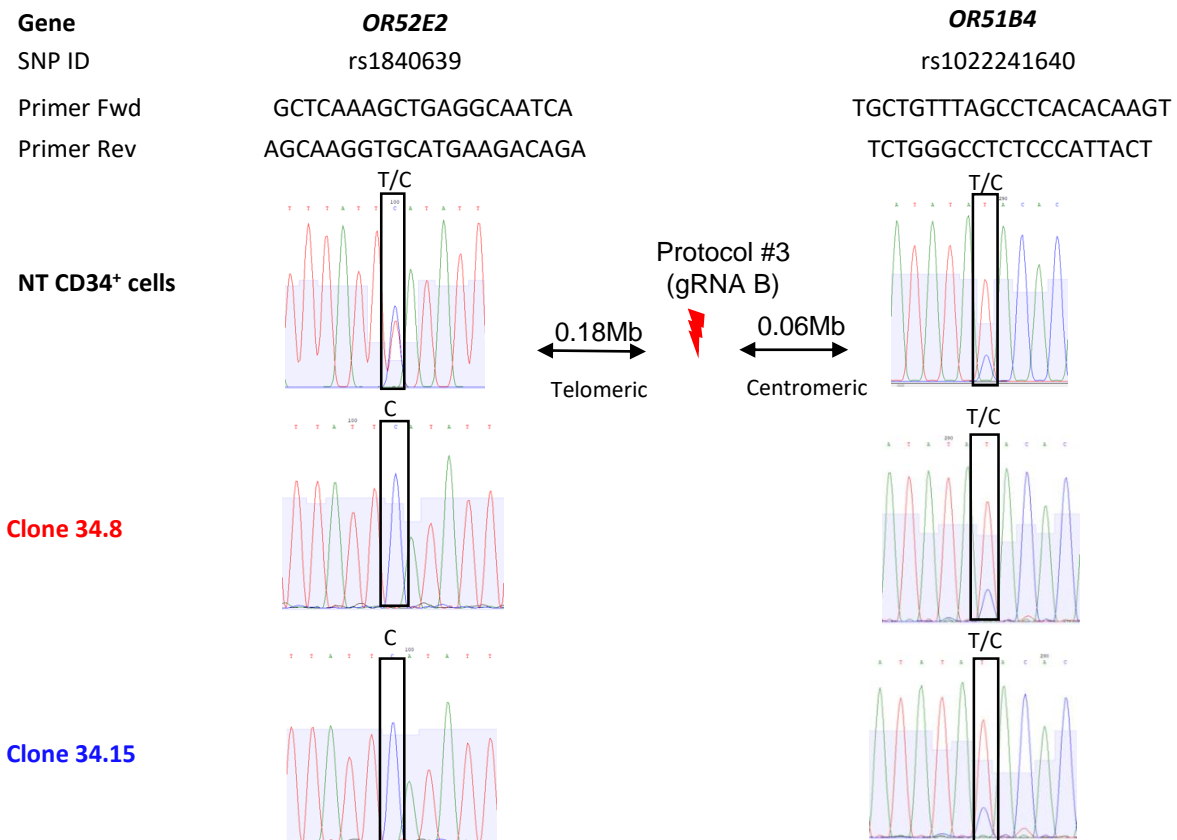

### Supplementary Fig. 9

**a, Sequence of the DNA breaking point site.** Clone 34.15 analysis at the break point indicates a homozygous deletion of 4 base pair (CTTC 152-156). The CN-LOH is starting at the breaking point and include it. Clone 34.8 analysis revealed the presence of a heterozygous edited sequence at cut site. The CN-LOH starts probably just downstream of the breaking point. NT-CD34<sup>+</sup> cells (non-transduced CD34<sup>+</sup> cells).

**b, Sequences of SNP framing the cutsite.** In both clones, the surrounding SNPs on the telomeric become homozygous whereas the centromeric SNPs are still heterozygous. Source data are provided as a Source Data file

a

## DNA methylation status:

## Methylation-specific PCR products melting curve analyses

*H19* DMR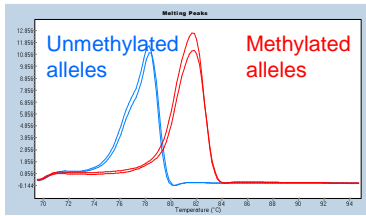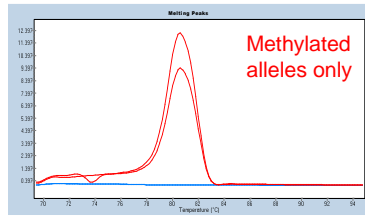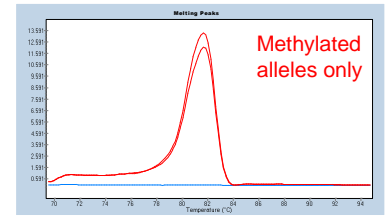*KCNQ1OT1*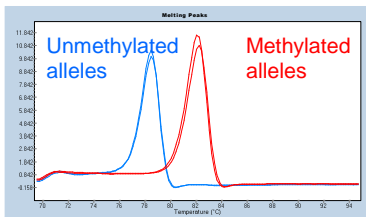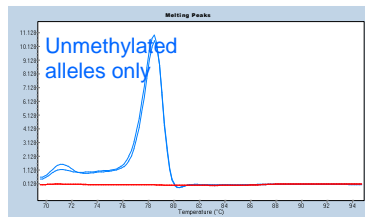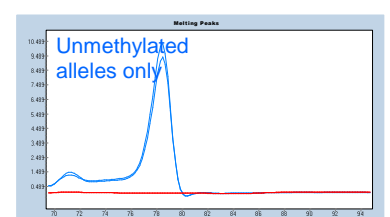NT CD34<sup>+</sup>

Clone 34.8

Clone 34.15

b

*IGF2-AS* (DMR)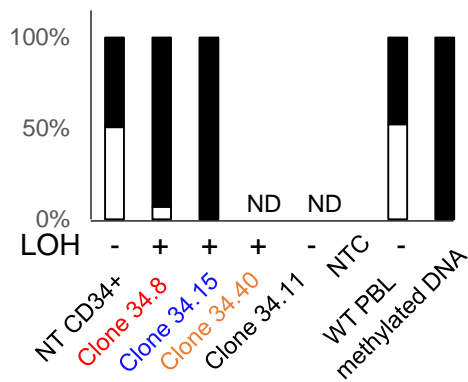Supplementary Fig. 10: Analysis of the methylation status of the *H19/IGF2/KCNQ1OT1* imprinting centers

a, Representative examples of methylation-specific PCR products melting curves analyses for the *H19* gene differentially methylated region (*H19* DMR, nucleotide positions analyzed here being -2164\_-2012 referring to transcription initiation site in sequence NR\_002196.2) and for the *KCNQ1OT1* gene (*KCNQ1* opposite strand/antisense transcript 1, nucleotide positions analyzed here being -480\_-457 referring to transcription initiation site in sequence NR\_002728).

Graphs and melting curves analyses show that wild type CD34<sup>+</sup> cells harbor both unmethylated and methylated alleles of *H19*, *IGF2*/antisense and *KCNQ1OT1* genes, while CRISPR clones 34.8 and 34.15 with iCN-LOH harbor only methylated alleles of *H19* and *IGF2* 5'/antisense and only unmethylated alleles of *KCNQ1OT1*. These data indicate, together with those of array-CGH and SNP analysis, the occurrence of LOH resulting in duplication of the paternal Chr11p15.4-pter region.

b, Percentages of unmethylated and methylated alleles of *IGF2-AS* gene differentially methylated region (*IGF2-AS* DMR) in NT-CD34<sup>+</sup> (non-transduced parental CD34<sup>+</sup> cells), clones 34.8, 34.15 and 34.40 with LOH and in clone 34.11 without LOH analyzed by quantitative real-time methylation-specific PCR (qMSP). WT peripheral blood leukocytes (PBL), *in vitro* methylated DNA and No DNA (NTC) were used as positive and negative controls. ND: non determined because of lack of DNA cell material.

| Protocol | Clone id | SNP       | SNP        | FISH                    | CGH         | LOH type   |
|----------|----------|-----------|------------|-------------------------|-------------|------------|
|          |          | rs2735691 | rs10835611 |                         |             |            |
| #1       | 6        | C/C       | C/C        | 2G30                    | Del 11p ter | Truncation |
|          | 12       | C/G       | C/G        | 2G30                    |             | Truncation |
|          | 28       | C/G       | C/G        | 2G30                    |             | Truncation |
|          | 29       | C/G       | C/G        | 2G30                    |             | Truncation |
|          | 30       | C/G       | C/G        | 3G30                    | without Del | CN-LOH     |
|          | 33       | C/G       | C/G        | 2G30                    |             | Truncation |
|          | 37       | C/C       | C/C        | 2G30                    |             | Truncation |
|          | 41       | C/G       | C/G        | 2G30                    |             | Truncation |
|          | 43       | C/C       | C/C        | 2G30                    |             | Truncation |
|          | 47       | C/C       | C/C        | 2G30                    |             | Truncation |
|          | 51       | C/G       | C/G        | 2G30                    |             | Truncation |
|          | 55       | C/G       | C/G        | 2G30                    |             | Truncation |
|          | 63       | C/G       | C/G        | ND                      |             |            |
| #2       | 6        | C/G       | C/G        | 2G30                    |             | Truncation |
|          | 8        | C/G       | C/G        | 2G30                    | Del 11p ter | Truncation |
|          | 14       | C/G       | C/G        | 2G30                    |             | Truncation |
|          | 23       | C/G       | C/G        | 2G30                    |             | Truncation |
|          | 25       | C/G       | C/G        | 2G30                    |             | Truncation |
|          | 28       | C/G       | C/G        | 2G30                    |             | Truncation |
|          | 31       | C/C       | C/C        | 2G30                    |             | Truncation |
|          | 34       | C/G       | C/G        | 2G30                    |             | Truncation |
|          | 39       | C/G       | C/G        | 2G30                    |             | Truncation |
|          | 41       | C/C       | C/C        | 3G30                    | without Del | CN-LOH     |
| #3       | 4        | C/C       | C/C        | 2G20<br>(diploid cells) |             | False LOH  |
|          | 8        | C/C       | C/C        | 2G30                    | Del 11p ter | Truncation |
|          | 9        | C/G       | C/G        | 2G30                    |             | Truncation |
|          | 10       | C/C       | C/C        | 2G30                    |             | Truncation |
|          | 13       | C/C       | C/C        | 2G30                    |             | Truncation |
|          | 18       | C/G       | C/G        | 2G20<br>(diploid cells) |             | False LOH  |
|          | 19       | C/G       | C/G        | 2G30                    |             | Truncation |

**Supplementary Table 1: Summary table of 29 HEK clones with LOH (among 149 clones).**

Results of SNP sequences, FISH and representative CGH-arrays. Notably, 2 clones are diploid 2G/2O (2/149=1.3%), in accordance of their previous presence in polyclonal controls before transfection (figure 2). Among LOH HEK clones, 92.6% are truncated (telomeric chr1p loss) and 7.4% had a copy-neutral LOH (normal CGH array).

| offtargetSeq              | Mismatch Pos | Mismatch Count | mitOfftarget Score | ofdOfftarget Score | chr   | start     | strand | locusDesc                              |
|---------------------------|--------------|----------------|--------------------|--------------------|-------|-----------|--------|----------------------------------------|
| TTAAAGGAAGACTTCTCCTCAGG   | *..*.....    | 3              | 2,543              | 0,3714             | chr3  | 181783908 | -      | intergenic:RP11-416O18.1-RP11-416O18.2 |
| GGAAAGGCAGACTTCTCCTTAGG   | ..*.....*    | 3              | 1,492              | 0,144              | chr5  | 56047170  | -      | intergenic:AC022431.2-AC008940.1       |
| GTAATGGCATATTTCTCCTCAGG   | .....**      | 3              | 1,152              | 0,2784             | chr1  | 227894391 | +      | exon:ZNF847P                           |
| GCAAAGGCAGACTTTTCTCCTCAGG | ..*.....*    | 3              | 0,796              | 0,0326             | chr6  | 11370627  | -      | intron:NEDD9                           |
| GGAGGGGCAGGCTTCTCCTCTGG   | ..**.....*   | 4              | 0,794              | 0,2047             | chr6  | 158896262 | -      | intron:TULP4                           |
| TGAGCGGCAGAGTTCTCCTCCGG   | **.....*     | 4              | 0,703              | 0,2333             | chr8  | 142113583 | +      | intergenic:RP11-128L5.1-DENND3         |
| CTATTGGCAGATTTCTCCTCTGG   | ..**.....*   | 4              | 0,703              | 0,1557             | chr6  | 38355520  | -      | intergenic:AL031905.1-BTBD9            |
| TTAACGGCAGACTTCTCTTCAGA   | *.....*      | 2              | 0,689              | 0,0446             | chr1  | 154268279 | +      | intergenic:RNU6-239P-RNU6-121P         |
| ATAATGGAAGACTTCTTCTCAGG   | ..*.....*    | 4              | 0,609              | 0,1737             | chr16 | 66100887  | -      | intergenic:RP11-356O24.1-RNA5SP428     |
| GTATAGGGAGACTTCTTCTCTGG   | .....**      | 4              | 0,578              | 0,1090             | chr1  | 66162904  | -      | intergenic:LEPR-RN7SL854P              |

Protocol #2: gRNA sequence **CTTGTCAAGGCTATTGGTCAAGG**

|                         |            |   |       |        |       |           |   |                                        |
|-------------------------|------------|---|-------|--------|-------|-----------|---|----------------------------------------|
| CTTGGCTTGGCTATTGGTCATGG | .....**    | 3 | 1,584 | 0,12   | chr15 | 77599510  | - | intron:PEAK1                           |
| CTTTCCAGGCTATTGGTCAAAG  | ..*.....*  | 2 | 0,781 | 0,0412 | chr7  | 18498593  | + | intron:HDAC9                           |
| CTGAGAAGCCTATTGGTCATGG  | ..**.....* | 4 | 0,749 | 0,05   | chr16 | 53173488  | + | intron:CHD9                            |
| ATTGTGAGCCTATTGGTCTGG   | *.....**   | 4 | 0,642 | 0,0666 | chr12 | 83139785  | + | intron:TMT2                            |
| GGTATCAAGGCTATTGATCAAGG | **.....*   | 4 | 0,609 | 0,6442 | chr3  | 123171288 | + | intergenic:ADCY5-PTPLB                 |
| TTTGTCTTGGCTATTGGTCAGGG | *.....**   | 4 | 0,569 | 0,1    | chr6  | 8812430   | + | intergenic:RP11-314C16.1-RP11-354I10.1 |
| TTAGTATAGGCTATTGGTCAGGG | ..**.....* | 4 | 0,556 | 0,2901 | chr3  | 39556291  | + | exon:MOBP                              |
| ACTGTCAGGCTATTGGTCACAG  | **.....*   | 3 | 0,508 | 0,1629 | chr2  | 176540232 | - | intergenic:AC096649.3-EXTL2P1          |
| CTTGTGAGGCTATTGGTCGAGG  | .....**    | 3 | 0,479 | 0,3657 | chr5  | 136821768 | - | intron:SPOCK1                          |
| TTTGTCTGGGCTATTGGTCTGG  | *.....**   | 4 | 0,476 | 0,0729 | chr3  | 821995    | - | intron:AC090044.1                      |

Protocol #3: gRNA sequence (site A) **ACCAATAGAACTGGGCATGTGG**

|                         |            |   |       |        |       |           |   |                                |
|-------------------------|------------|---|-------|--------|-------|-----------|---|--------------------------------|
| AACAATAGATACTGGGCATGAGG | ..*.....*  | 2 | 6,944 | 0,6417 | chr8  | 77152103  | - | intergenic:snoU13-RNU2-54P     |
| AACAGGAGAAACTGGGCATGAGG | *..**..... | 3 | 1,468 | 0,2992 | chr17 | 53453866  | + | intergenic:RP11-515O17.3-MMD   |
| AACTAGAGAAACTGGGCATGTGG | ..**.....* | 3 | 1,468 | 0,2644 | chr9  | 75644446  | - | intron:ALDH1A1                 |
| AAGAGTAAAAACTGGGCATGGGG | **..*..... | 4 | 1,345 | 0,2618 | chr4  | 60481397  | + | intron:RP11-725D20.1           |
| AATCTTAGAAACTGGGCATGGGG | ****.....  | 4 | 1,286 | 0,0641 | chrX  | 46542070  | + | intergenic:SLC9A7-YBX1P8       |
| AAGTATAGACTGGGCATGAGG   | **.....*   | 4 | 1,239 | 0,0771 | chr4  | 106238408 | - | intergenic:RN7SL89P-PPA2       |
| AGCAGTAGAAACTGGGCATGAAG | *..*.....* | 2 | 1,144 | 0,1298 | chr3  | 135259720 | - | intergenic:RP11-657O9.1-U8     |
| TACAGTGGAAACTGGGCATGGGG | **..*..... | 4 | 0,932 | 0,3696 | chr1  | 36730757  | - | intron:THRAP3                  |
| AGCAACAGAAACTGGGCATCAGG | ..*.....*  | 3 | 0,902 | 0,2710 | chr13 | 100850484 | - | exon:RP11-340C20.3             |
| ATCACTGGACACTGGGCATGGGG | ..*.....*  | 4 | 0,858 | 0,1069 | chr13 | 111479400 | - | intergenic:LINC00567-LINC00346 |

Protocol #3: gRNA sequence (site B) **AGGGTGCTACATACTTCTTAAGG**

|                        |            |   |        |             |       |           |   |                                 |
|------------------------|------------|---|--------|-------------|-------|-----------|---|---------------------------------|
| AGGGTGCTTACTTCTTAAGG   | .....**    | 2 | 2,9373 | 0,537815126 | chr22 | 25377404  | + | intron:KIAA1671                 |
| CGTGAGCCACATACTTCTATGG | **..*..... | 4 | 1,345  | 0,214285714 | chr3  | 57909466  | + | intron:SLMAP                    |
| TTGGTGCTACATACTTCTAAGG | **.....*   | 3 | 1,290  | 0,296969697 | chr3  | 74510655  | + | intron:CNTN3                    |
| ATAAAGCTACATACTTCTAAGG | ****.....  | 4 | 1,286  | 0,214772727 | chr13 | 57471877  | + | intergenic:RN7SKP6-PRR20A       |
| AAGGTGCTACATACTTCTACAG | *.....*    | 2 | 1,045  | 0,102374169 | chr7  | 18410922  | - | intron:HDAC9                    |
| AGACAGATACATACTTCTAAGG | ..**.....* | 4 | 0,878  | 0,148897059 | chr13 | 38637197  | - | intron:LINC00571                |
| ATAATGCTACCTACTTCTAAGG | **.....*   | 4 | 0,782  | 0,171818182 | chr5  | 137065790 | - | intron:KLHL3                    |
| AGGGTGTTAGATACTTCTGTGG | .....**    | 3 | 0,779  | 0,241625817 | chr8  | 21769672  | - | intron:DOK2                     |
| ATAACTACATACTTCTAAGG   | **..*..... | 4 | 0,778  | 0,429545454 | chr5  | 64930979  | - | intergenic:CTC-534A2.2-TRAPPC13 |
| AAATACTACATACTTCTATGG  | **..*..... | 4 | 0,778  | 0,230769231 | chr22 | 26185619  | + | intron:MYO18B                   |

| Protocol #1      | experiment #1 |      | experiment #2 |      | experiment #3 |      |
|------------------|---------------|------|---------------|------|---------------|------|
|                  | NT            | #1   | NT            | #1   | NT            | #1   |
| total cells (n)  | 523           | 413  | 396           | 587  | 434           | 608  |
| 2O/2G cells (%)  | 94.6          | 92.7 | 97.7          | 96.8 | 97            | 96.7 |
| 2O/2G difference | -1.9          |      | -0.9          |      | -0.3          |      |
| 1O/2G cells (%)  | 0.2           | 0.5  | 0.3           | 0.1  | 1.2           | 0.3  |
| 1O/2G difference | 0,3           |      | -0,2          |      | -0,9          |      |
| 2O/1G cells (%)  | 5.2           | 6.8  | 2             | 3.1  | 1.8           | 3    |
| 2O/1G difference | 1.6           |      | 1.1           |      | 1.2           |      |

| Protocol #3      | experiment #1 |      | experiment #2 |      | experiment #3 |      | experiment #4 |      |
|------------------|---------------|------|---------------|------|---------------|------|---------------|------|
|                  | NT            | #3   | NT            | #3   | NT            | #3   | NT            | #3   |
| total cells (n)  | 393           | 428  | 396           | 525  | 92            | 339  | 92            | 334  |
| 2O/2G cells (%)  | 94.9          | 90.7 | 97.7          | 96.2 | 97.8          | 95.2 | 97.8          | 92.2 |
| 2O/2G difference | -4.2          |      | -1.5          |      | -2.6          |      | -5.6          |      |
| 1O/2G cells (%)  | 1.8           | 0.9  | 0.3           | 0.2  | 0             | 0.3  | 0             | 0.3  |
| 1O/2G difference | -0,9          |      | -0,1          |      | 0,3           |      | 0,3           |      |
| 2O/1G cells (%)  | 3.3           | 8.4  | 2             | 3.6  | 2.2           | 4.5  | 2.2           | 7.4  |
| 2O/1G difference | 5.1           |      | 1.6           |      | 2.3           |      | 5.2           |      |

### Supplementary Table 3

Polyclonal Chr11 DNA-FISH analysis at D18 of edited cells with protocols #1 and #3. percentages in non-transfected cells as control (NT, Non-Transfected) and edited cells with protocols #1 and #3 (n=7).

| INDELS |                       |            |
|--------|-----------------------|------------|
|        | Primer sequence       | Protocol # |
| HBB Fw | AGTCAGGGCAGAGCCATCTA  | 1          |
| HBB Rv | CTGTCTCCACATGCCCAGTT  |            |
| HBG Fw | ACGGCTGACAAAAGAAGTCCT | 2          |
| HBG Rv | AGCCTTGTCCTCCTCTGTGA  |            |
| G1A Fw | AGGCCATCACTAAAGGCACC  | 3          |
| G1A Rv | AGTCAGGGCAGAGCCATCTA  |            |
| G1B Fw | AGCACCGCCTATCTATGTGC  |            |
| G1B Rv | GGAAACTGGATGCAGAGACCA |            |

## SNP screening

| Primer sequence SNP screening |                         | Target SNP              | Target cell |
|-------------------------------|-------------------------|-------------------------|-------------|
| RRM1 F1                       | GCACAGGACCTGACATGAAC    | rs2735691<br>rs10835611 | HEK293T     |
| RRM1 R1                       | TGCTCTTTGGTCAGCTAAAATGT |                         |             |
| RRM1 F2                       | CCTGCCTGATGAGGAAAGATG   | rs4910888<br>rs4910889  | CD34+       |
| RRM1 R2                       | AGGCAATTCCACAGTATGGGT   |                         |             |
| CARS F7                       | GGAGGTGCCGTACATCTCAC    | rs369461 rs399565       | CD34+       |
| CARS R7                       | GACCTTGGCACTGCAACTAAA   |                         |             |
| KCNQ1 F                       | CCCCACACTCACTGCTACAT    | rs231357                | CD34+       |
| KCNQ1 R                       | GGGGAGGATGAAGTTAGCTGA   |                         |             |
